# Supplementary material for: An Integrated Computational and Experimental Approach to Formulate Tamanu Oil Bigels as Anti-Scarring Agent
Source: Pharmaceuticals (Basel). 2024 Jan 11;17(1):102. doi: 10.3390/ph17010102 (PMC10818744; doi:10.3390/ph17010102)
Supplement: Supplementary file 1 [file pharmaceuticals-17-00102-s001.zip › pharmaceuticals-2704656-supplementary.pdf]

**Supplementary information file for “An Integrated Computational and Experimental Approach to Formulate Tamanu Oil Bigels as Anti-Scarring Agent”**

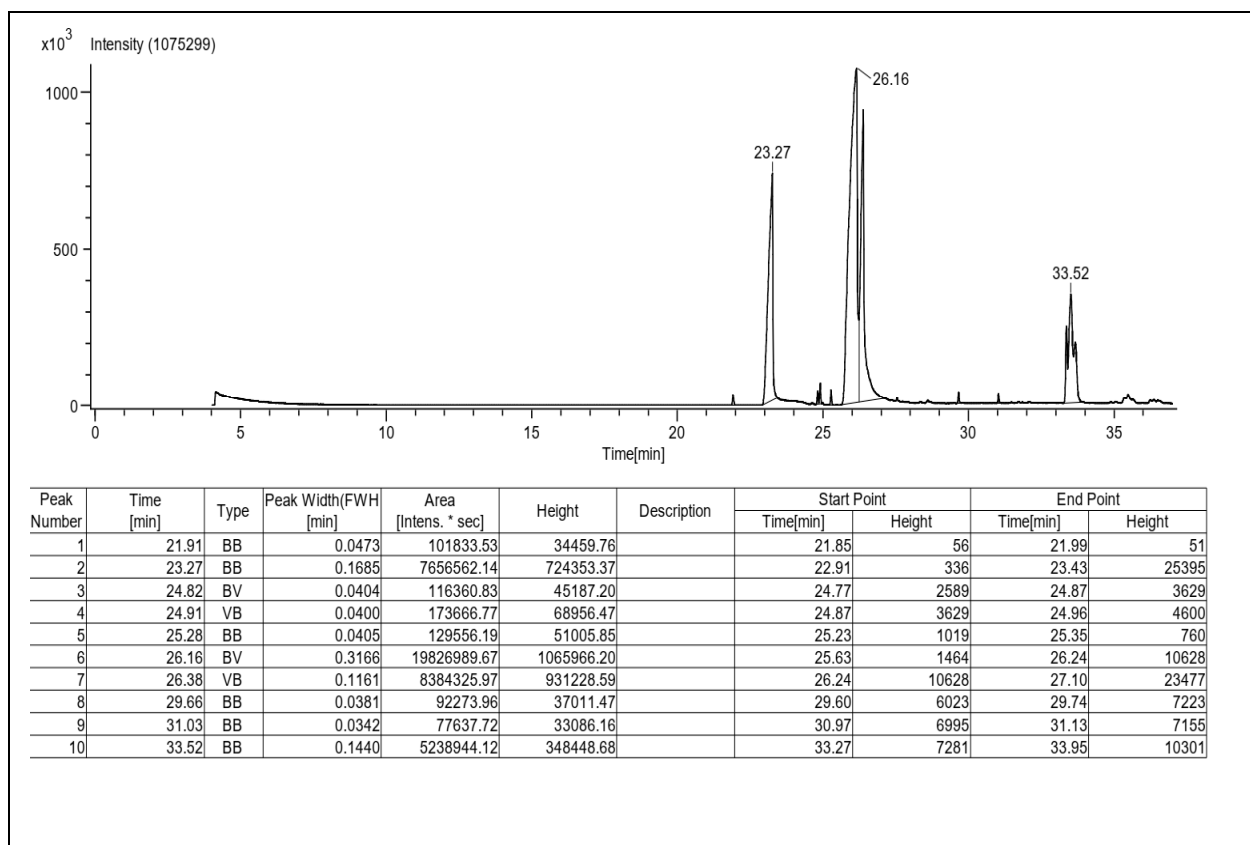

**Figure S1:** Representative GC chromatogram of tamanu oil components

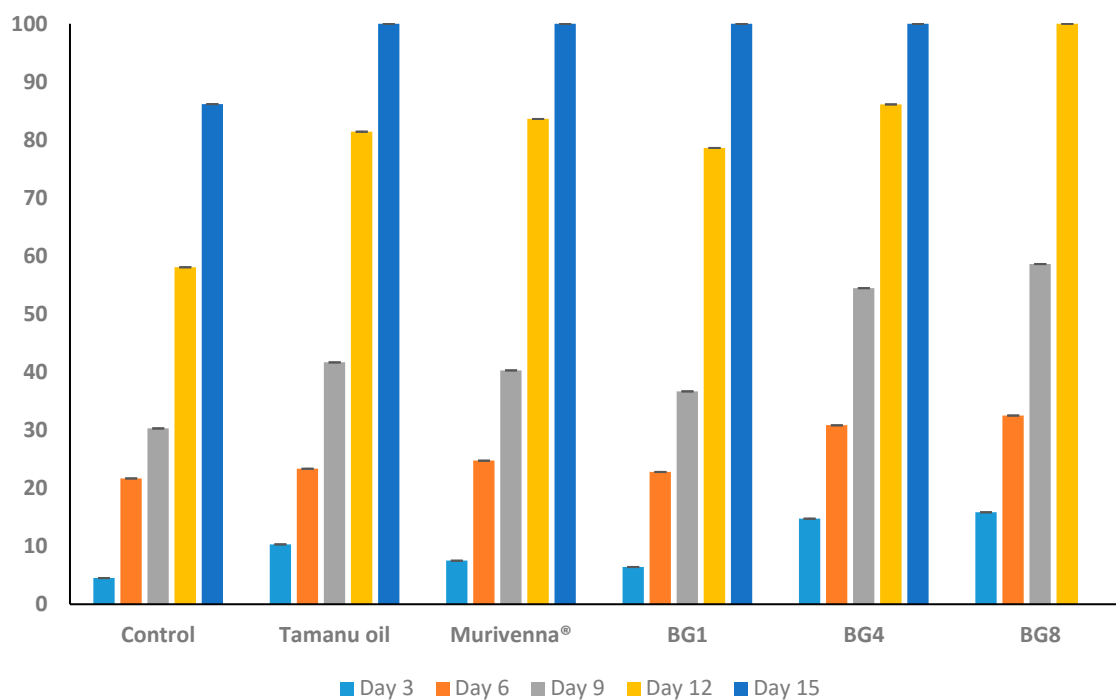

**Figure S2:** Graphical representation of % Wound Contraction

| Groups     | (H& E)                                                                              | Masson’s trichome (MT)                                                               |
|------------|-------------------------------------------------------------------------------------|--------------------------------------------------------------------------------------|
| Control    | 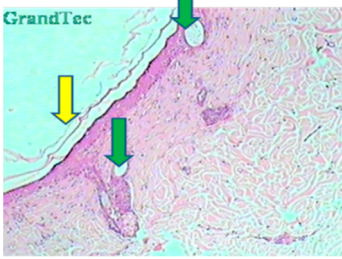   | 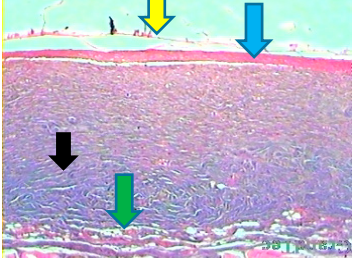   |
| Tamanu oil | 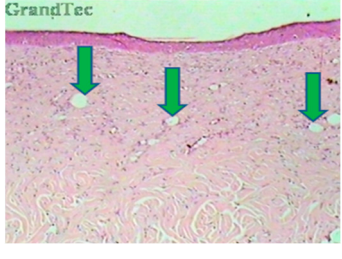   | 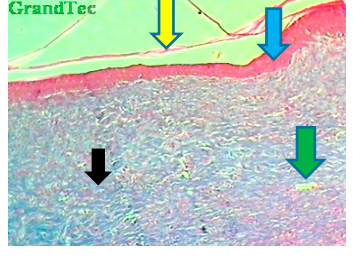   |
| Murivenna® | 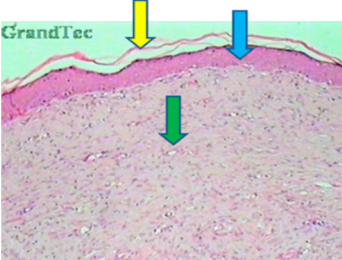  | 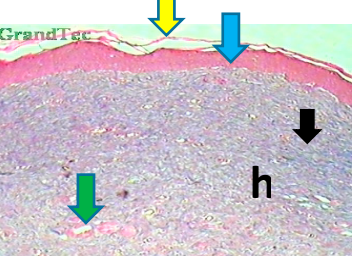  |
| BG1        | 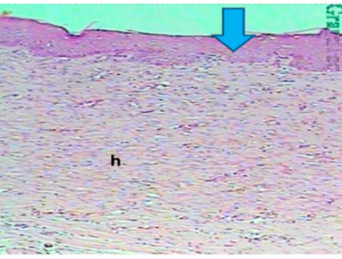 | 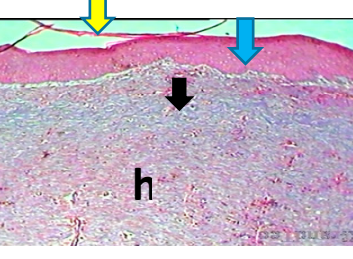 |
| BG4        | 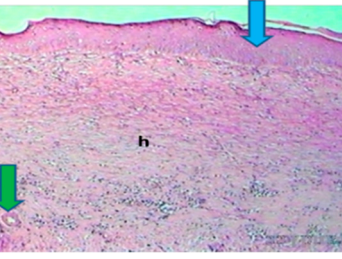 | 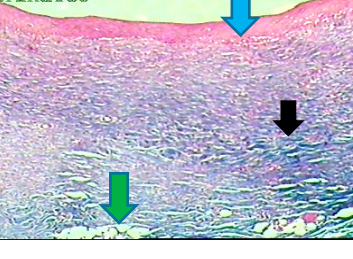 |

BG8

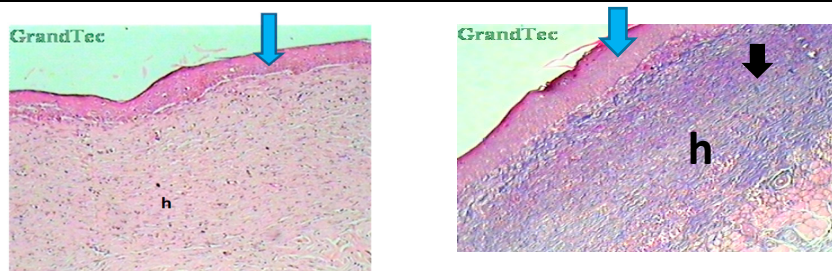

**Figure S3:** Photomicrographs (100x) showing H&E stain and MT stain section of skin tissues at day 15 for control, standard and formulation treated groups

(**Yellow**- re-epithelialization, **Green**- irregular connective tissue, **Blue**- epidermis, **Black**- collagen formation and **h**- healed area with multiple layers of fibrous connective tissue)

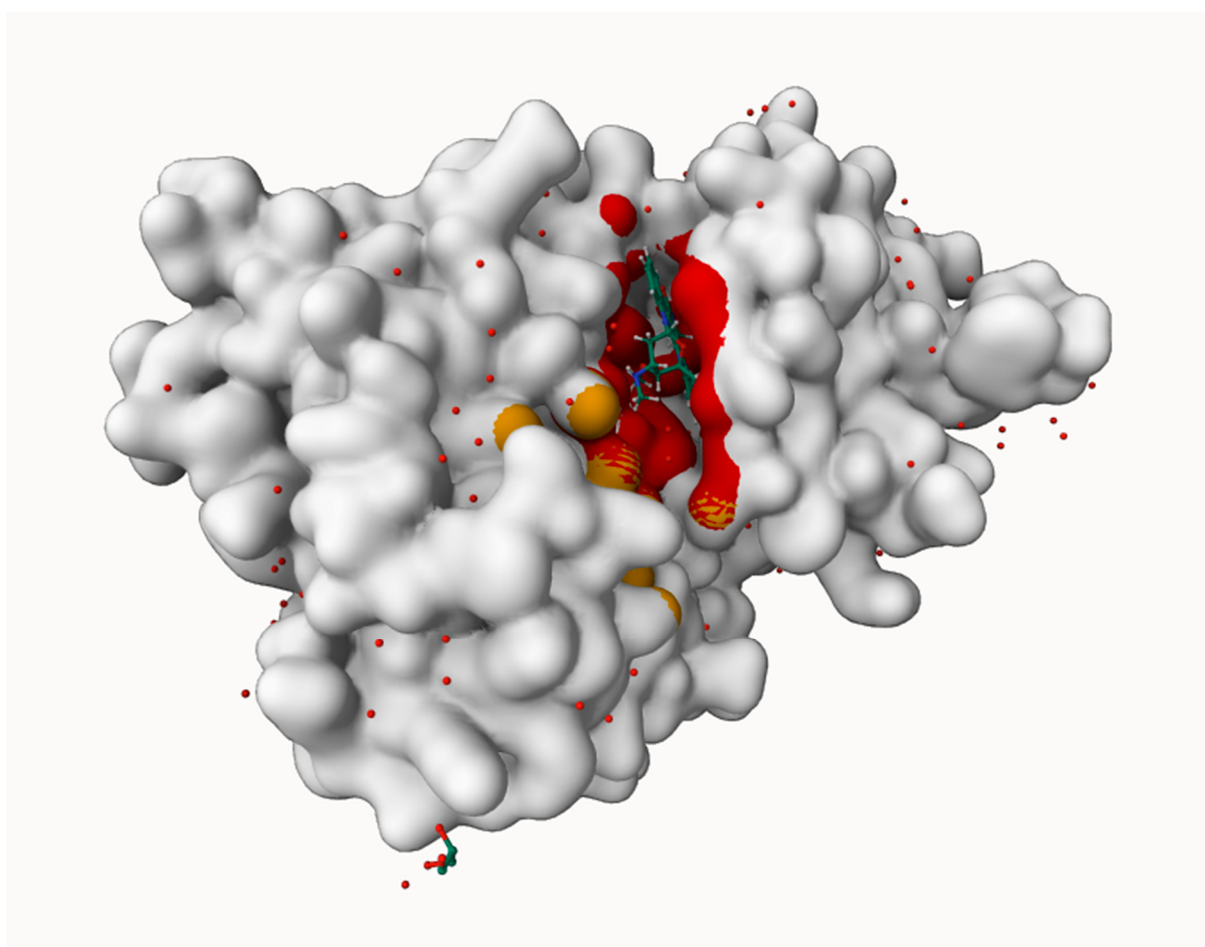

**Figure S4:** TGF-β type 1 kinase (5E8W) with binding site

**Table S1:** Molecular docking results (Kcal/mol)

| Compounds             | Structure                                                                          | 5KF4 | 3UTZ | 3V96 | 5K5X | 6T9D | 4D2R | 7SZL | 2L3Y |
|-----------------------|------------------------------------------------------------------------------------|------|------|------|------|------|------|------|------|
| <b>Calophyllolide</b> | 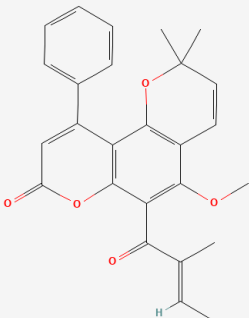  | -4.9 | -4.5 | -4   | -4.4 | -4.7 | -4.6 | -4.8 | -4.9 |
| <b>Inophyllum C</b>   | 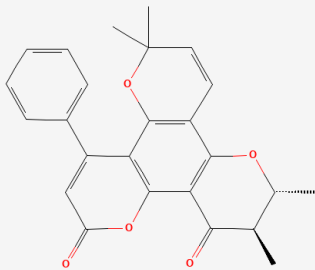 | -5.8 | -3.1 | -7   | -7.6 | -5.4 | -7.5 | -7.2 | -5.6 |

|               |                                                                                     |      |      |      |      |      |      |      |      |
|---------------|-------------------------------------------------------------------------------------|------|------|------|------|------|------|------|------|
| Calanolide A  | 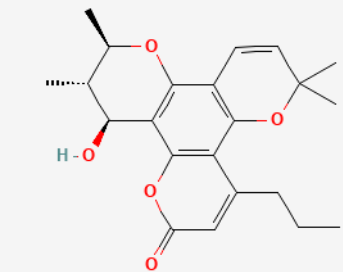   | -4   | -6.7 | -4.4 | -6.5 | -6   | -7.2 | -7.7 | -6.1 |
| Oleic acid    | 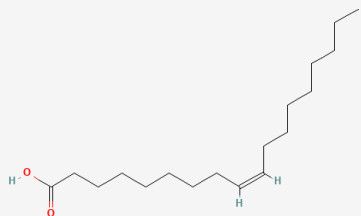   | -4.5 | -5.9 | -4   | -5.2 | -6.4 | -6.5 | -6.8 | -5.6 |
| Linoleic acid | 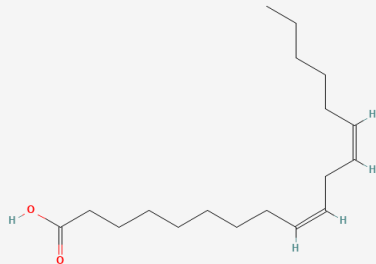 | -5.8 | -5.8 | -6.2 | -7   | -7.6 | -7.6 | -5.8 | -7.6 |

|                                                                          |                                                                                     |      |      |      |      |      |      |      |      |
|--------------------------------------------------------------------------|-------------------------------------------------------------------------------------|------|------|------|------|------|------|------|------|
| Palmitic acid                                                            | 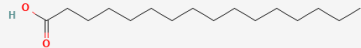   | -5.8 | -4.6 | -5.3 | -6.6 | -7.2 | -7.2 | -6.1 | -6.7 |
| 4-Norlanosta-17(20),24-diene-11,16-diol-21-oic acid, 3-oxo-16,21-lactone | 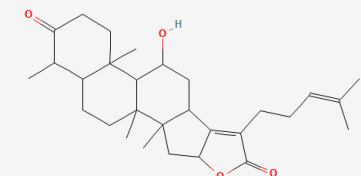   | -4.9 | -6   | -4.7 | -5.8 | -4.8 | -6.4 | -6.1 | -6.9 |
| Hyenic acid                                                              | 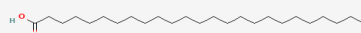 | -5.5 | -4.9 | -4.4 | -4.8 | -5.1 | -4.9 | -5   | -5.9 |

**Table S2:** Molecular properties of Ligands (constituents of Tamanu oil)

| <b>Properties/ Drugs</b>                                                        | <b>Molecular Weight</b> | <b>LogP</b> | <b>No. of Rotatable Bonds</b> | <b>No. of H-Bond Acceptors</b> | <b>No. of H-Bond Donors</b> | <b>Surface Area (m<sup>2</sup>)</b> |
|---------------------------------------------------------------------------------|-------------------------|-------------|-------------------------------|--------------------------------|-----------------------------|-------------------------------------|
| <b>Calophyllolide</b>                                                           | 416.473                 | 5.8017      | 4                             | 5                              | 0                           | 180.154                             |
| <b>Inophyllum C</b>                                                             | 402.446                 | 5.2439      | 1                             | 5                              | 0                           | 173.473                             |
| <b>Calanolide A</b>                                                             | 370.445                 | 4.3801      | 2                             | 5                              | 1                           | 158.144                             |
| <b>4-Norlanosta-17(20),24-diene-11,16-diol-21-oic acid, 3-oxo-16,21-lactone</b> | 454.651                 | 5.7834      | 3                             | 4                              | 1                           | 198.78                              |

**Table S3:** Predicted ADMET properties of compounds

| Properties                                 | Calophyllolide | Inophyllum<br>C | Calanolide<br>A | 4-Norlanosta-17(20),24-diene-11,16-diol-21-oic acid, 3-oxo-16,21-lactone |
|--------------------------------------------|----------------|-----------------|-----------------|--------------------------------------------------------------------------|
| Water solubility (log mol/L)               | -5.699         | -4.952          | -4.982          | -5.716                                                                   |
| Caco2 permeability (log Papp in 10-6 cm/s) | 1.121          | 1.119           | 0.757           | 0.605                                                                    |
| Skin Permeability (log Kp)                 | -2.702         | -2.729          | -3.013          | -3.253                                                                   |
| P-glycoprotein substrate                   | No             | No              | Yes             | No                                                                       |
| P-glycoprotein I inhibitor                 | Yes            | Yes             | Yes             | Yes                                                                      |
| P-glycoprotein II inhibitor                | Yes            | Yes             | Yes             | Yes                                                                      |
| VDss (human)(log L/kg)                     | 0.47           | 0.169           | 0.371           | -0.124                                                                   |
| Fraction unbound (human)(Fu)               | 0.147          | 0.165           | 0.103           | 0                                                                        |
| BBB permeability (log BB)                  | -0.823         | -0.453          | -0.322          | -0.56                                                                    |
| CNS permeability (log PS)                  | -1.678         | -1.606          | -1.82           | -1.59                                                                    |
| CYP2D6 substrate                           | No             | No              | No              | No                                                                       |
| CYP3A4 substrate                           | Yes            | Yes             | Yes             | Yes                                                                      |
| CYP1A2 inhibitor                           | Yes            | Yes             | Yes             | No                                                                       |
| CYP2C19 inhibitor                          | Yes            | Yes             | Yes             | No                                                                       |
| CYP2C9 inhibitor                           | Yes            | Yes             | Yes             | No                                                                       |

**Supplementary information file for “An Integrated Computational and Experimental Approach to Formulate Tamanu Oil Bigels as Anti-Scarring Agent”**

|                                                   |       |       |        |        |
|---------------------------------------------------|-------|-------|--------|--------|
| <b>CYP2D6 inhibitor</b>                           | No    | No    | No     | No     |
| <b>CYP3A4 inhibitor</b>                           | Yes   | Yes   | Yes    | No     |
| <b>Total Clearance(log ml/min/kg)</b>             | 0.757 | 0.589 | 0.506  | 0.331  |
| <b>Renal OCT2 substrate</b>                       | No    | No    | No     | No     |
| <b>AMES toxicity</b>                              | No    | No    | No     | No     |
| <b>Max. tolerated dose (human)(log mg/kg/day)</b> | 0.255 | 0.11  | -0.315 | -0.535 |
| <b>hERG I inhibitor</b>                           | No    | No    | No     | No     |
| <b>hERG II inhibitor</b>                          | Yes   | Yes   | Yes    | No     |
| <b>Hepatotoxicity</b>                             | No    | Yes   | No     | No     |
| <b>Skin Sensitisation</b>                         | No    | No    | No     | No     |

**Table S4:** Period of epithelialization in all groups

| <b>Sl. no.</b> | <b>Groups</b> | <b>Period of Epithelialization (days)</b> |
|----------------|---------------|-------------------------------------------|
| <b>1.</b>      | Control       | 12.83±0.30                                |
| <b>2.</b>      | Tamanu oil    | 10.16 ±0.47**                             |
| <b>3.</b>      | Murivenna®    | 10.00±0.36**                              |
| <b>4.</b>      | BG1           | 11.50±0.42*                               |
| <b>5.</b>      | BG4           | 8.16±0.60**                               |
| <b>6.</b>      | BG8           | 6.66±0.66**                               |

Data are expressed as Mean ± SEM (n=6) and analysed by one-way ANOVA method of variance followed by Dunnett test for multiple comparison. ns p>0.05, \* p<0.05, \*\* p<0.01, in comparison to control. (Where, ns= non-significant, \* moderately significant,

**Supplementary information file for “An Integrated Computational and Experimental Approach to  
Formulate Tamanu Oil Bigels as Anti-Scarring Agent”**

**Table S5:** Formulation of Bigels

|                                   | <b>BG1</b> | <b>BG2</b> | <b>BG3</b> | <b>BG4</b> | <b>BG5</b> | <b>BG6</b> | <b>BG7</b> | <b>BG8</b> |
|-----------------------------------|------------|------------|------------|------------|------------|------------|------------|------------|
| <b>OLEOGEL PHASE</b>              |            |            |            |            |            |            |            |            |
| <b>Tween 20 (mL)</b>              | 3          | 3          | 3          | 3          | 3          | 3          | 3          | 3          |
| <b>Tamanu oil (mL)</b>            | 5          | 10         | 15         | 20         | 5          | 10         | 15         | 20         |
| <b>HYDROGEL PHASE</b>             |            |            |            |            |            |            |            |            |
| <b>Micronized Xanthan gum (g)</b> | 1          | 1          | 1          | 1          | 2          | 2          | 2          | 2          |
| <b>Geogard® ECT (mL)</b>          | 1          | 1          | 1          | 1          | 1          | 1          | 1          | 1          |
| <b>Vanilla fragrance oil (mL)</b> | 0.5        | 0.5        | 0.5        | 0.5        | 0.5        | 0.5        | 0.5        | 0.5        |
| <b>Water (mL)</b>                 | q.s 100mL  |            |            |            |            |            |            |            |
